# Supplementary material for: A Human Ovarian Tumor & Liver Organ-on-Chip for Simultaneous and More Predictive Toxo-Efficacy Assays
Source: MDPI journal article supplement (doi:10.3390/bioengineering10020270), 2023-02-18
Supplement: s1 [file s1]

Supplementary data

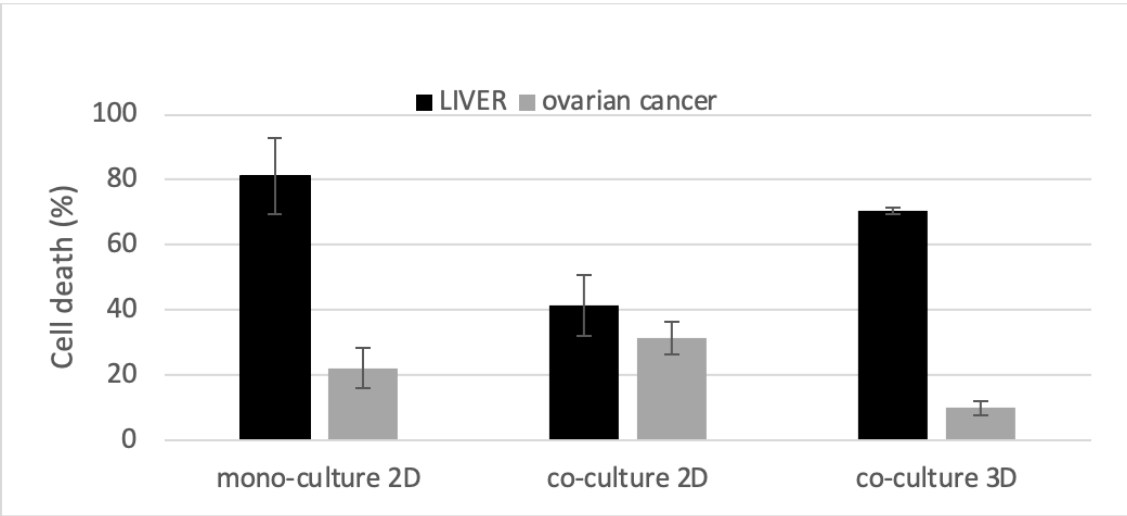

**Figure S1:** Cisplatin response in mono-culture vs co-culture conditions (drug dose of 10 $\mu$ M). The effect of cisplatin against liver and ovarian cells was measured considering a plasma concentration (i.e. 10 $\mu$ M). Values are reported as mean  $\pm$  SD for each condition.
